# Supplementary material for: SHARAKU: an algorithm for aligning and clustering read mapping profiles of deep sequencing in non-coding RNA processing
Source: PubMed Central journal article supplement — Bioinformatics. 2016 Jun 11;32(12):i369–77. doi: 10.1093/bioinformatics/btw273 (PMC4908357; doi:10.1093/bioinformatics/btw273), 2016-06-11

Supplementary information:

“SHARAKU: An algorithm for aligning and clustering read mapping profiles of deep sequencing in non-coding RNA processing”

Mariko Tsuchiya, Kojiro Amano, Masaya Abe, Misato Seki, Sumitaka Hase, Kengo Sato and Yasubumi Sakakibara\*

## Supplemental Figure

Supplemental Figure 1. All read mapping profiles obtained by mapping the simulated read data to the 102 annotated small RNA sequences.

miRNAs (24 genes):

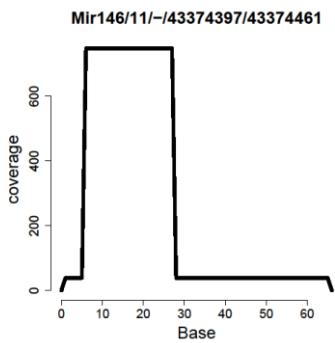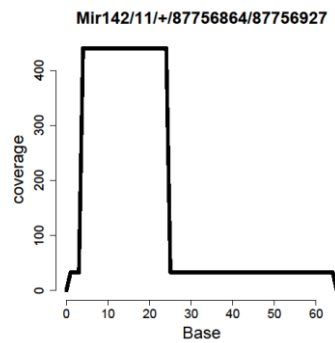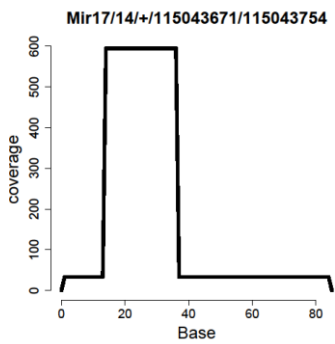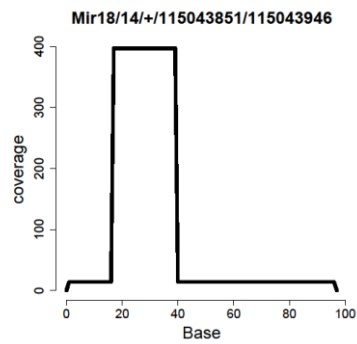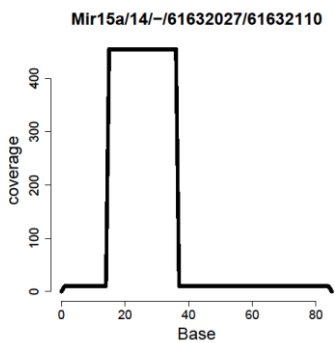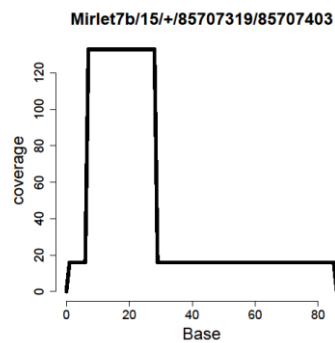

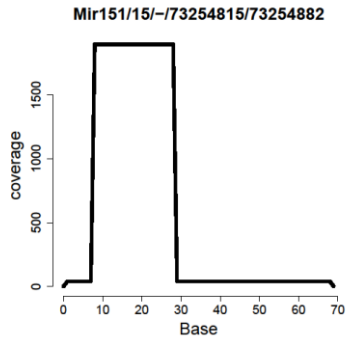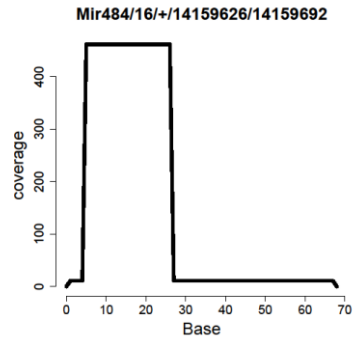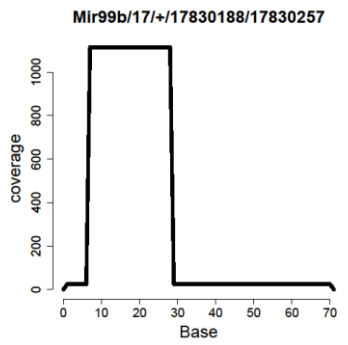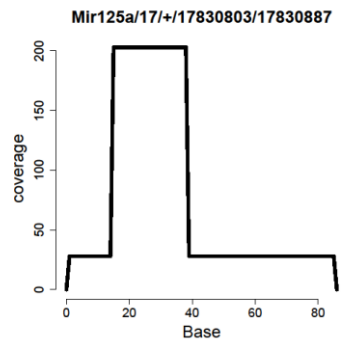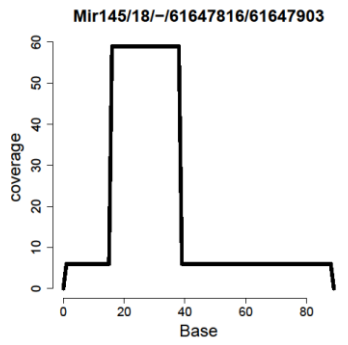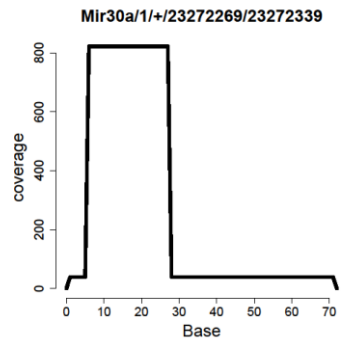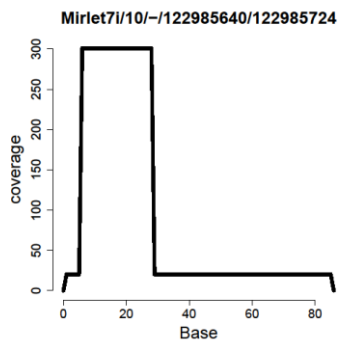

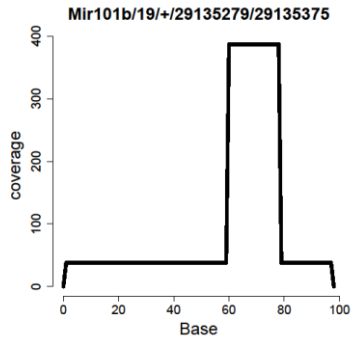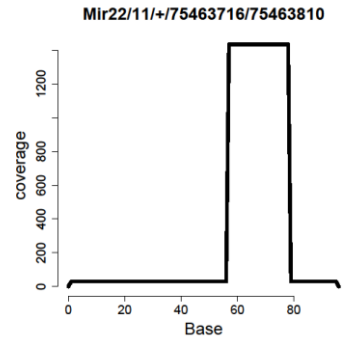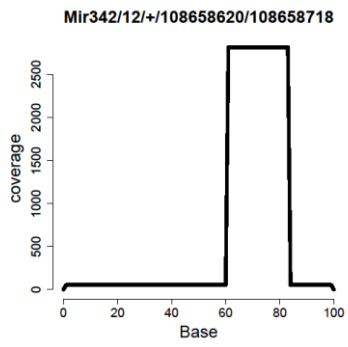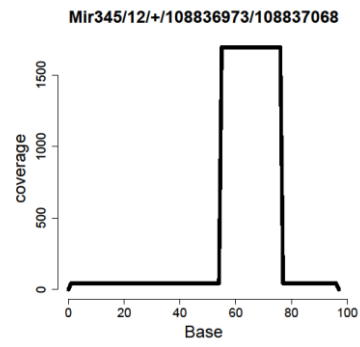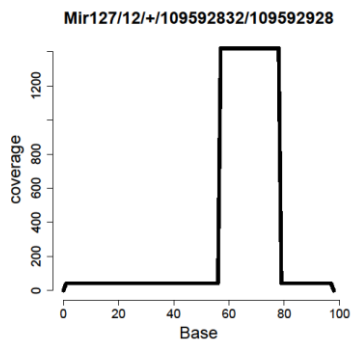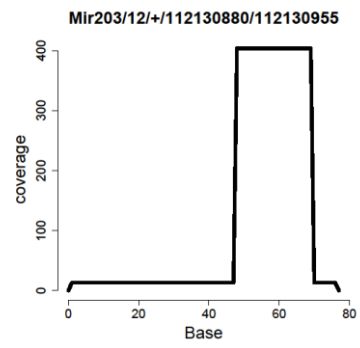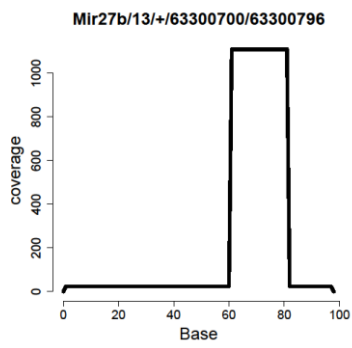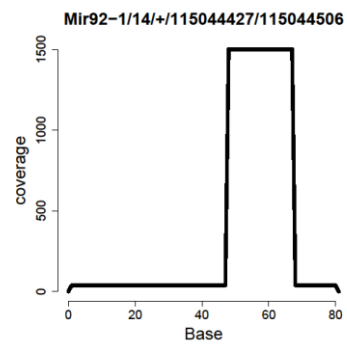

**Mir19a/14/+/115044000/115044081**

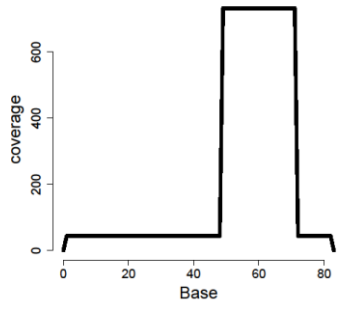

**Mir28/16/+/24827855/24827940**

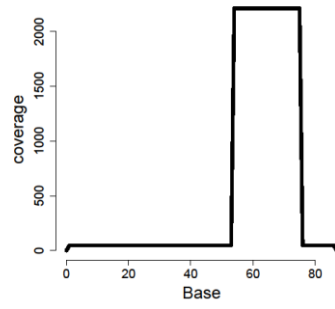

**Mir143/18/-/61649196/61649258**

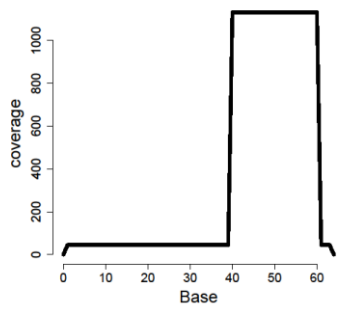

snoRNAs (37 genes):

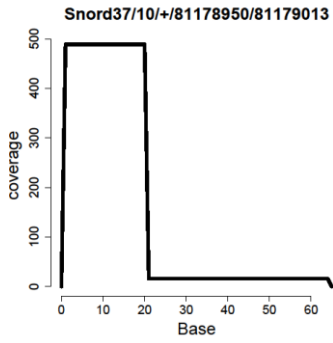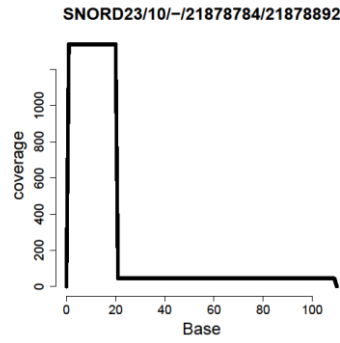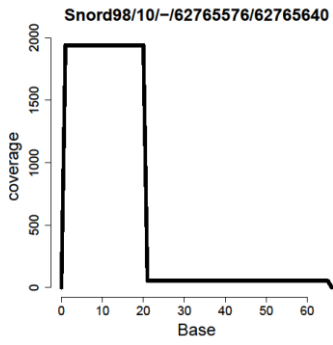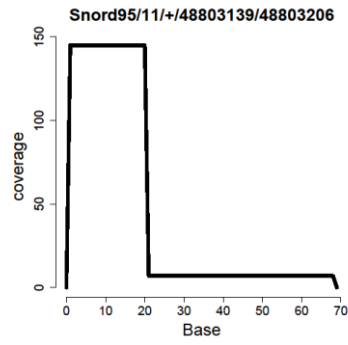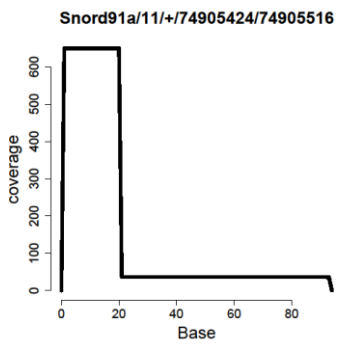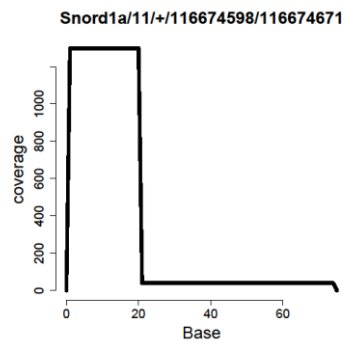

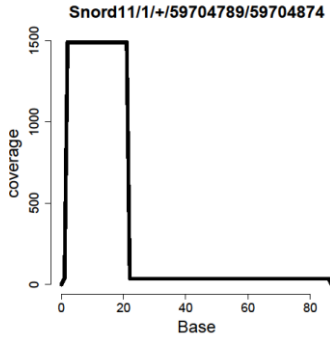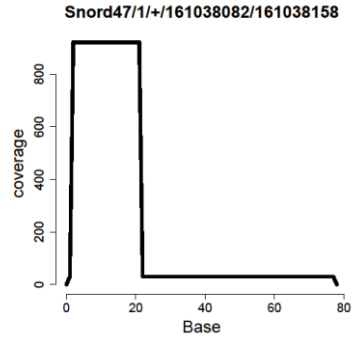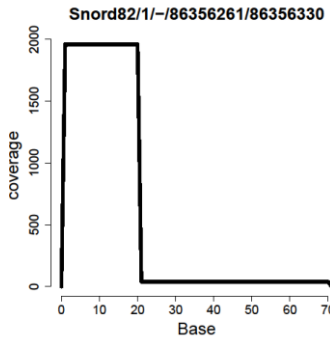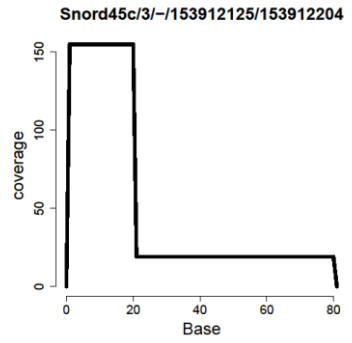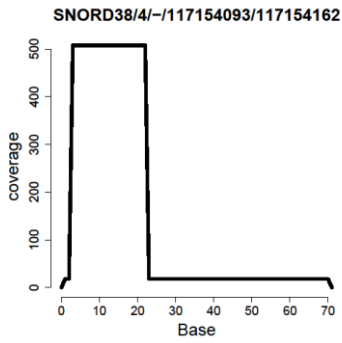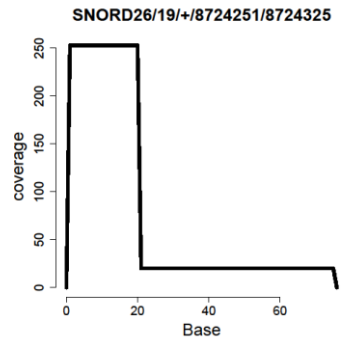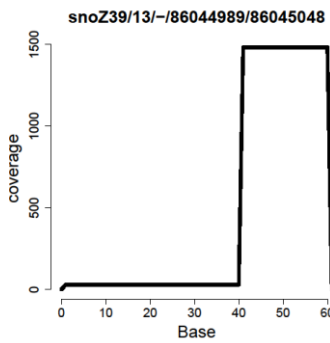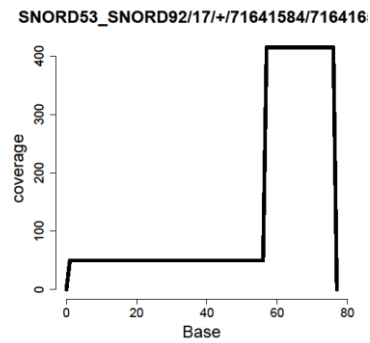

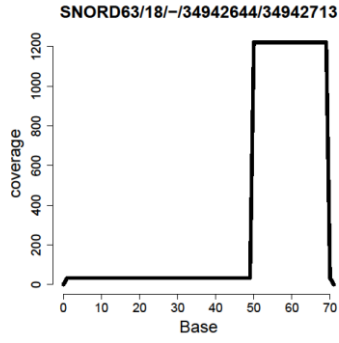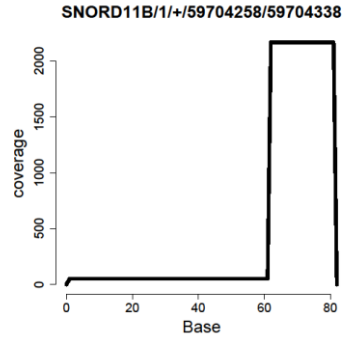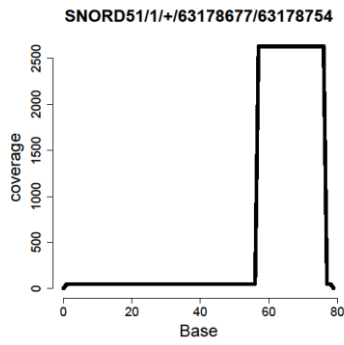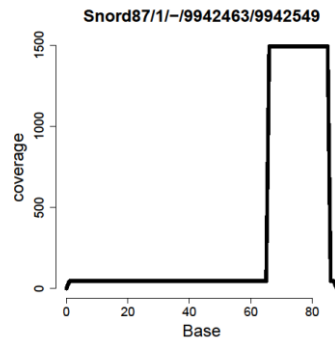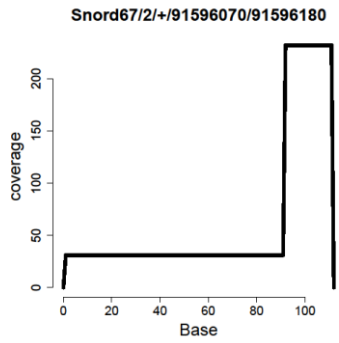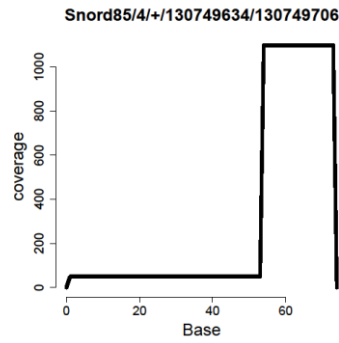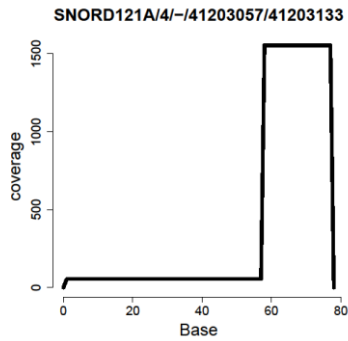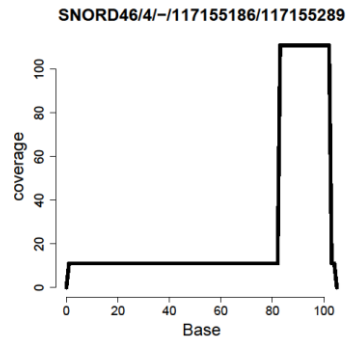



SNORD16/9/+/64175423/64175521

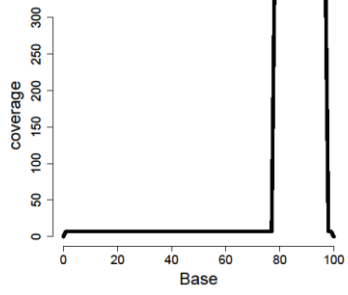

SNORD59/10/+/128084143/128084216

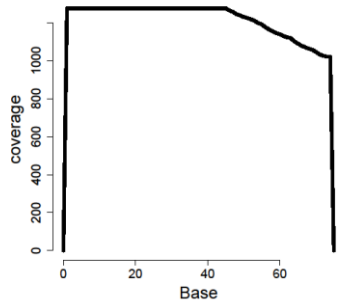

SNORD113/12/+/109656345/109656416

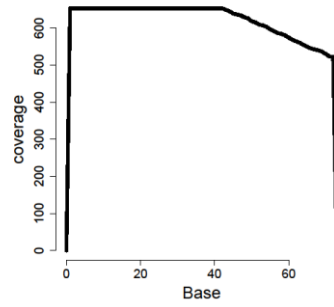

SNORD58/14/+/52069300/52069369

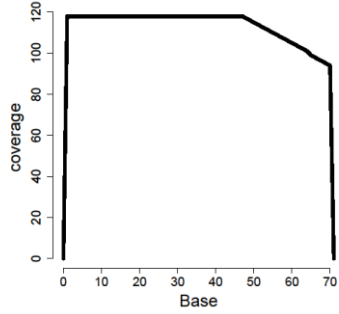

Snord66/16/+/20684239/20684313

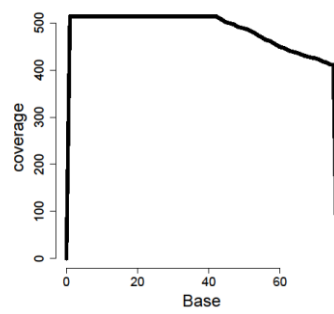

SNORD83/17/+/35247175/35247250

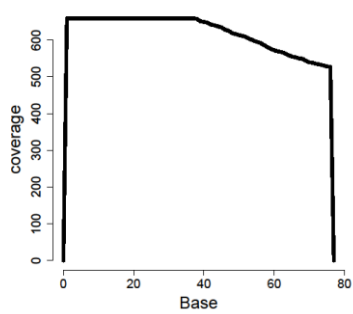

Snord58b/18/+/75001058/75001123

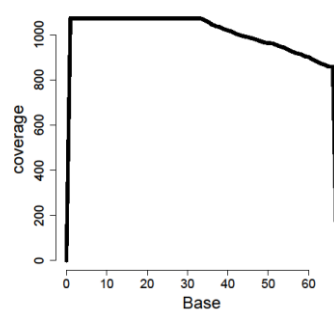

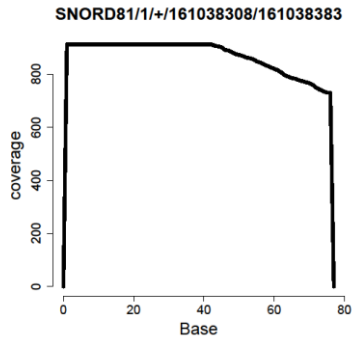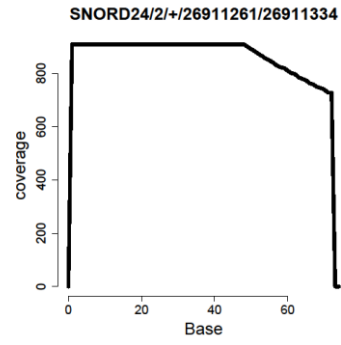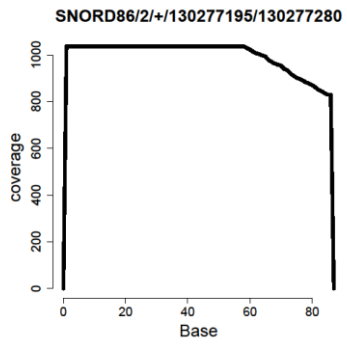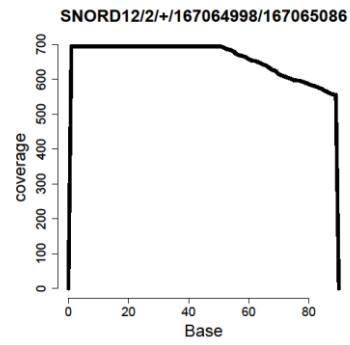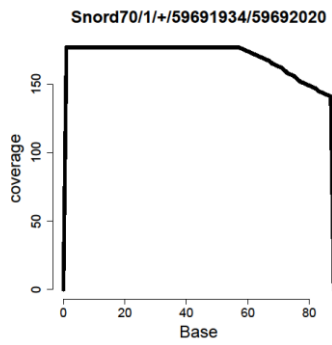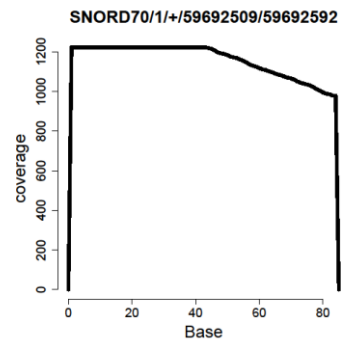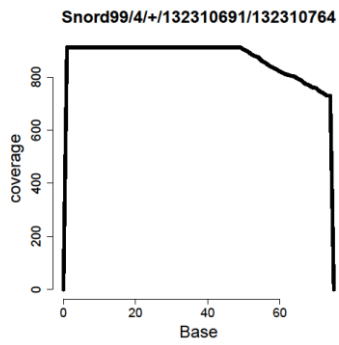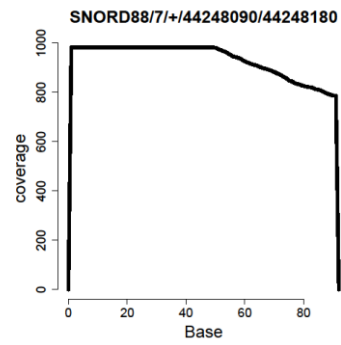

tRNAs (41 genes):

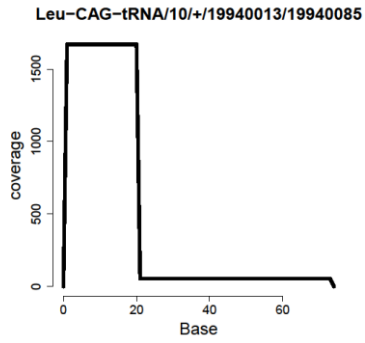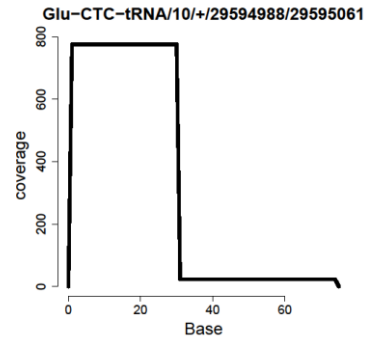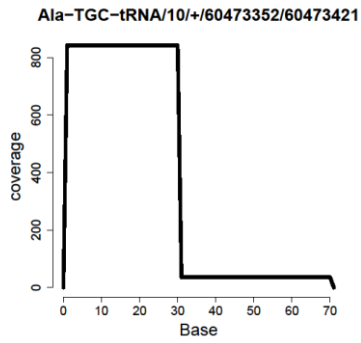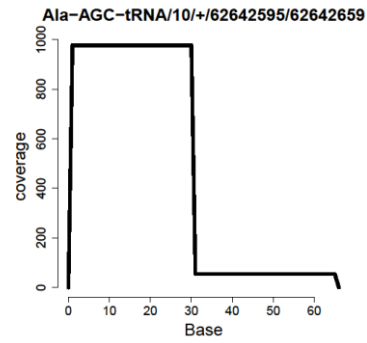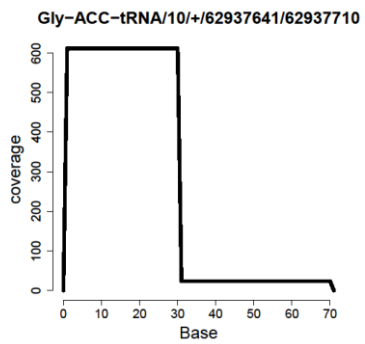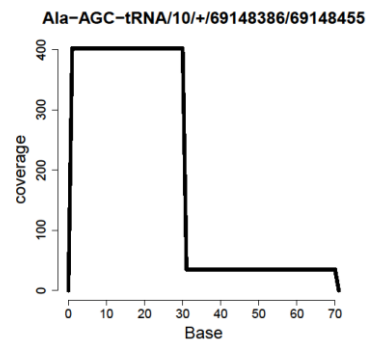

Ser-GCT-tRNA/10/+87075251/87075322

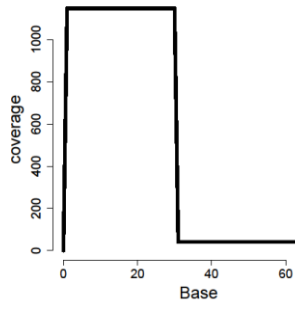

Ala-AGC-tRNA/10/+95063309/95063377

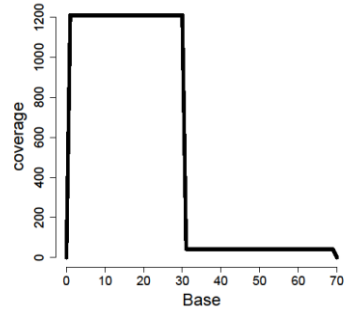

Ser-GCT-tRNA/10/+103356103/103356174

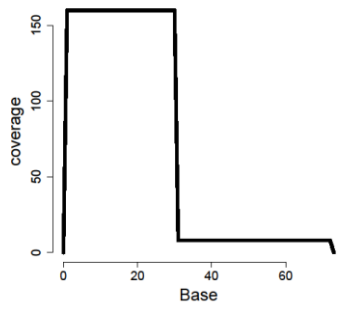

Ile-AAT-tRNA/10/+105391053/105391127

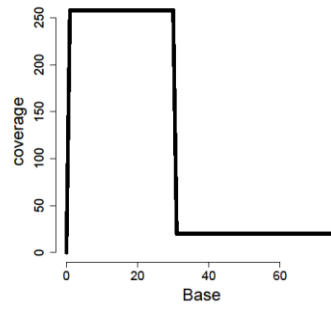

Asn-GTT-tRNA/10/+110810401/110810472

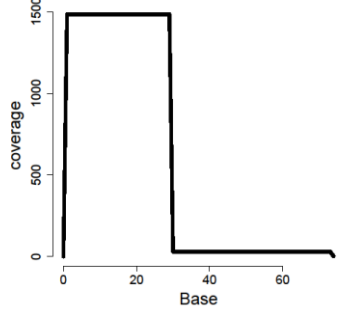

Ala-AGC-tRNA/10/+111109450/111109521

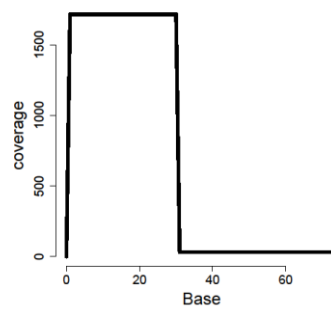

Thr-GGT-tRNA/10/+126900102/126900173

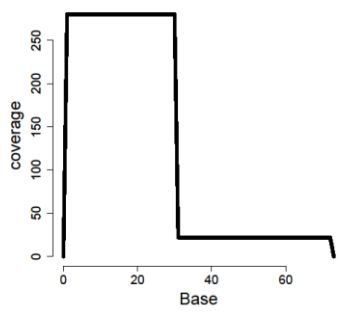

Met-CAT-tRNA/12/+86551561/86551632

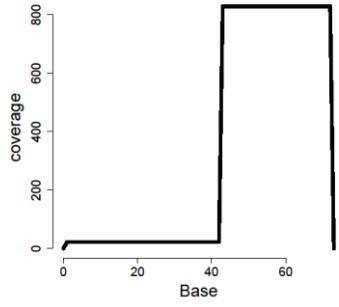

Ser-GCT-tRNA/11/-95952589/95952658

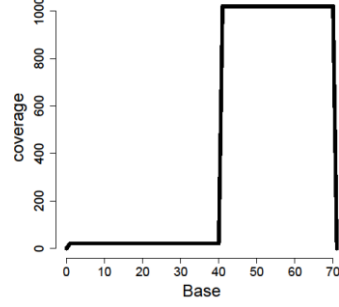

Gly-ACC-tRNA/11/-105247999/105248071

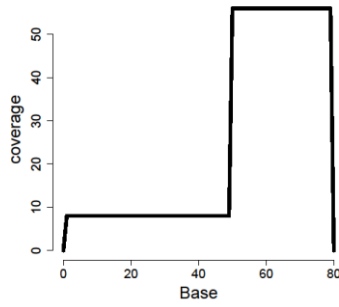

Ala-AGC-tRNA/11/-116415979/116416051

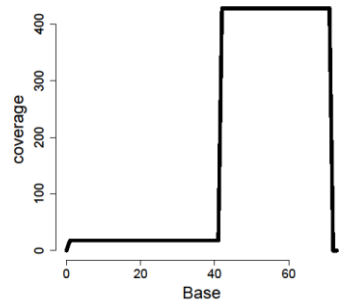

Thr-TGT-tRNA/11/-117987594/117987666

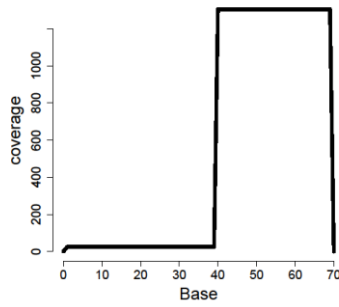

Ala-TGC-tRNA/12/+16321418/16321487

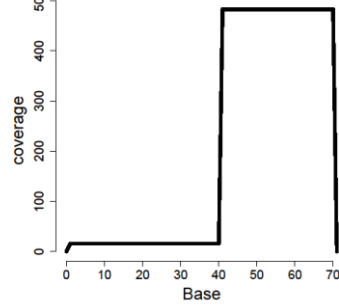

Ala-AGC-tRNA/12/+16852070/16852139

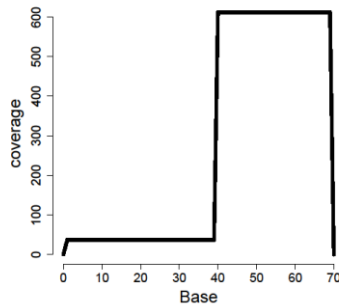

Glu-CTC-tRNA/12/+24467219/24467290

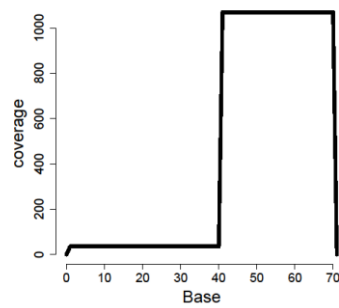

Val-AAC-tRNA/12/+31651885/31651956

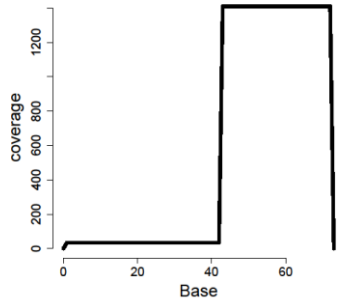

Ala-AGC-tRNA/12/+54244071/54244142

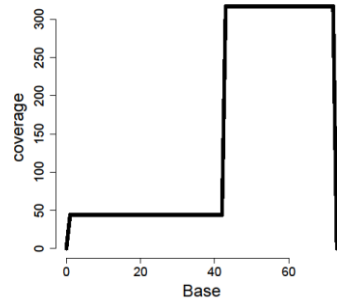

Asn-GTT-tRNA/12/+66833318/66833385

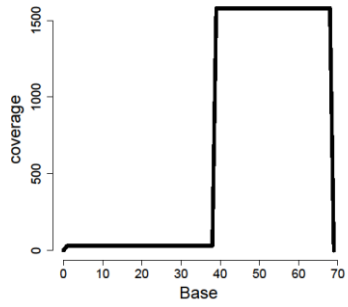

Glu-CTC-tRNA/12/+73003789/73003861

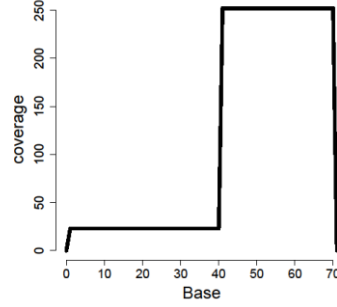

Ala-AGC-tRNA/12/+91730713/91730781

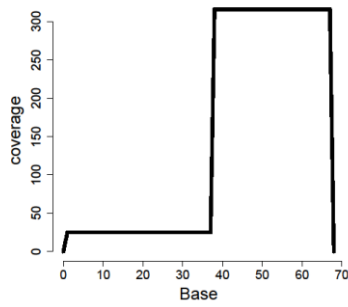

Arg-CCT-tRNA/6/+38533931/38534003

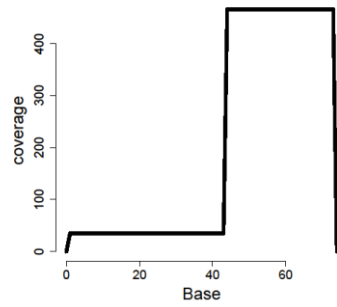

Phe-AAA-tRNA/11/+94888957/94889028

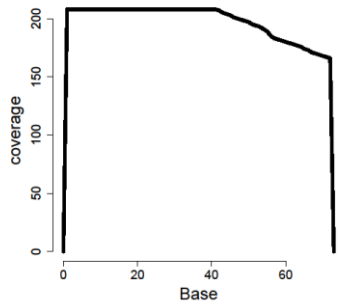

Leu-CAA-tRNA/13/+21914838/21914943

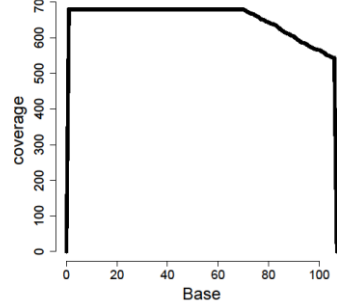

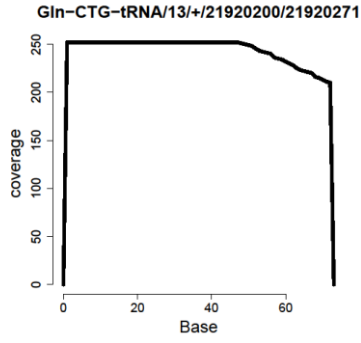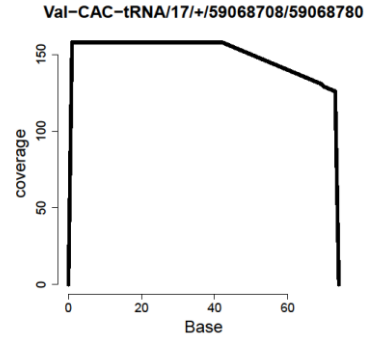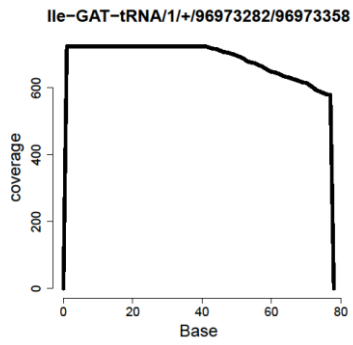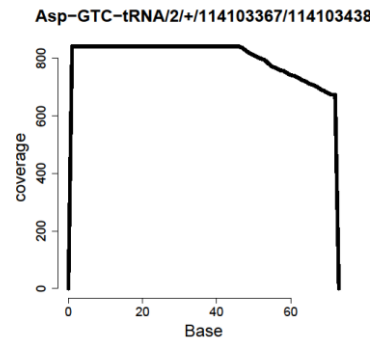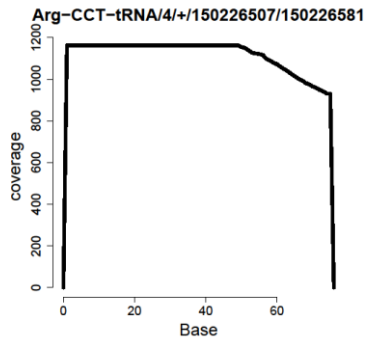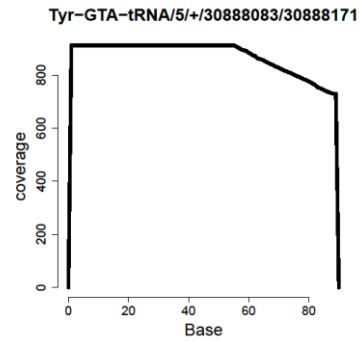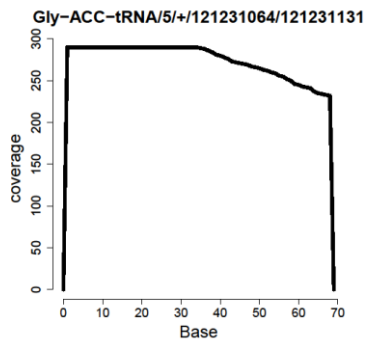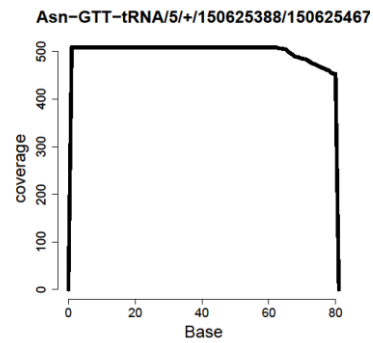

Lys-CTT-tRNA/6/+/125308431/125308505

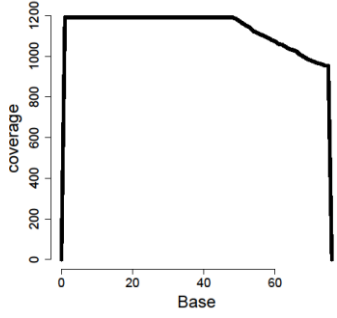

Gly-TCC-tRNA/8/+/36717443/36717515

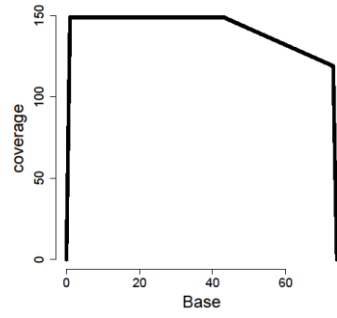

Asn-GTT-tRNA/8/+/120625978/120626055

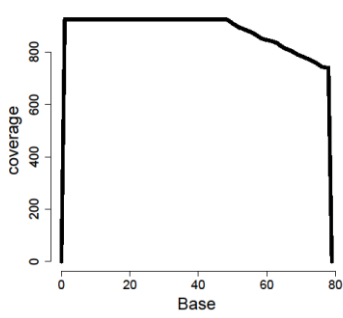

Val-AAC-tRNA/9/+/77393736/77393812

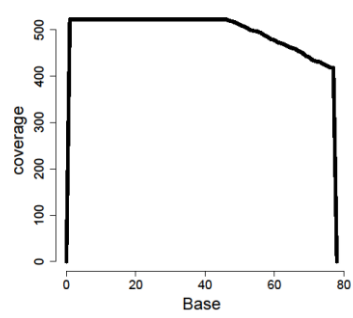



Supplemental Figure 2. (a) An alignment produced by SHARAKU for a pair of RNAs (Mir92-1 and SNORD63) in the simulated dataset with the annotations of RNA sequence alignment and the predicted secondary structure. The solid line represents the read coverages of Mir92-1, and the dashed line represents the read coverages of SNORD63. The similarity score is 0.562. (b) An alignment produced by deepBlockAlign for a pair of RNAs (Mir92-1 and SNORD63) in the simulated dataset. The similarity score is 0.87.

(a)

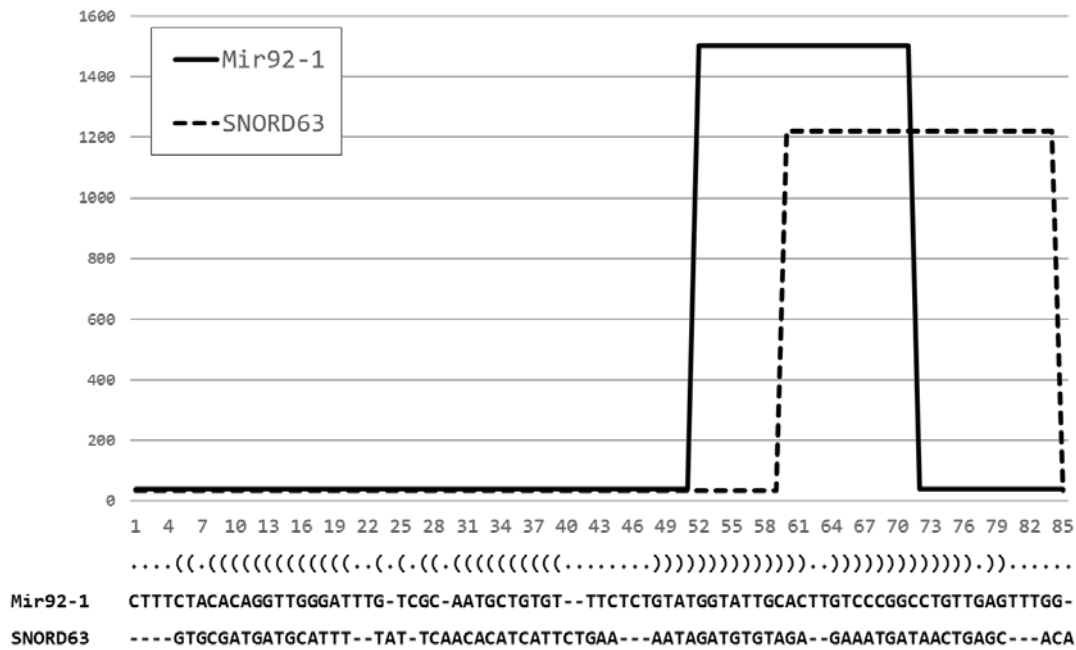

(b)

cluster-64-Mir92-1(+) with cluster-77-SNORD63(-) [Score: 0.87]

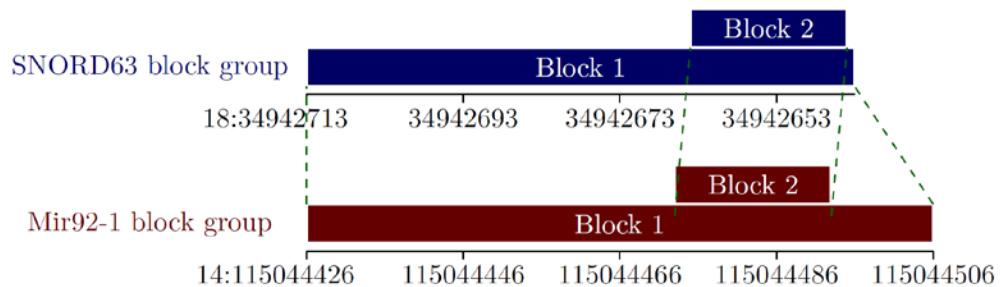

Supplemental Figure 3. (a) An alignment produced by SHARAKU for a pair of RNAs (Mir22 and Mir143) in the simulated dataset with the annotations of RNA sequence alignment and the predicted secondary structure. The solid line represents the read coverages of Mir22, and the dashed line represents the read coverages of Mir143. The similarity score is 0.999. (b) An alignment produced by deepBlockAlign for a pair of RNAs (Mir22 and Mir143) in the simulated dataset. The similarity score is 0.34.

(a)

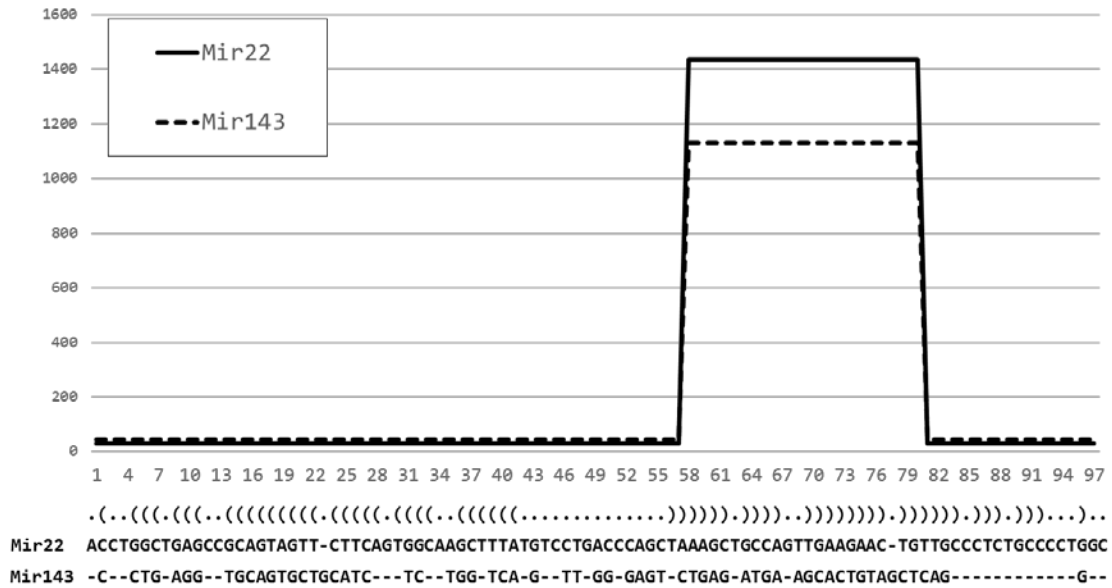

(b)

cluster-33-Mir22(+) with cluster-79-Mir143(-) [Score: 0.34]

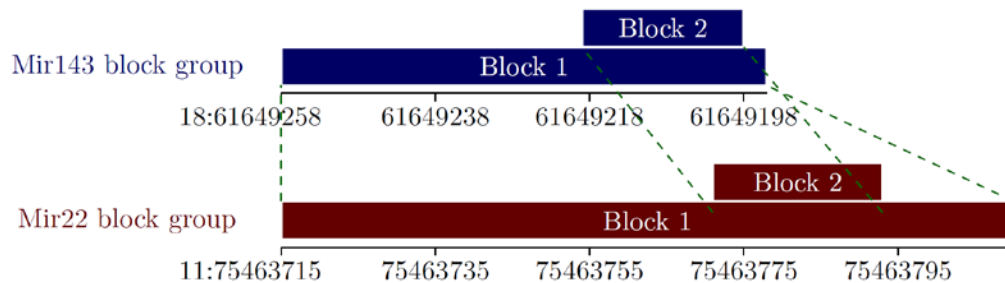

Supplemental Figure 4.

(a) Dendrogram of the hierarchical clustering result based on deepBlockAlign alignments for the read mapping profiles on the real dataset obtained from an RNA-seq experiment of the hippocampus of common marmoset.

As the input to deepBlockAlign, the output of blockbuster executed on the input of the real dataset was given together with the sequence annotation information. The blocks with the maximum read coverage less than 3 were all removed.

0.0 0.2 0.4 0.6 0.8 1.0

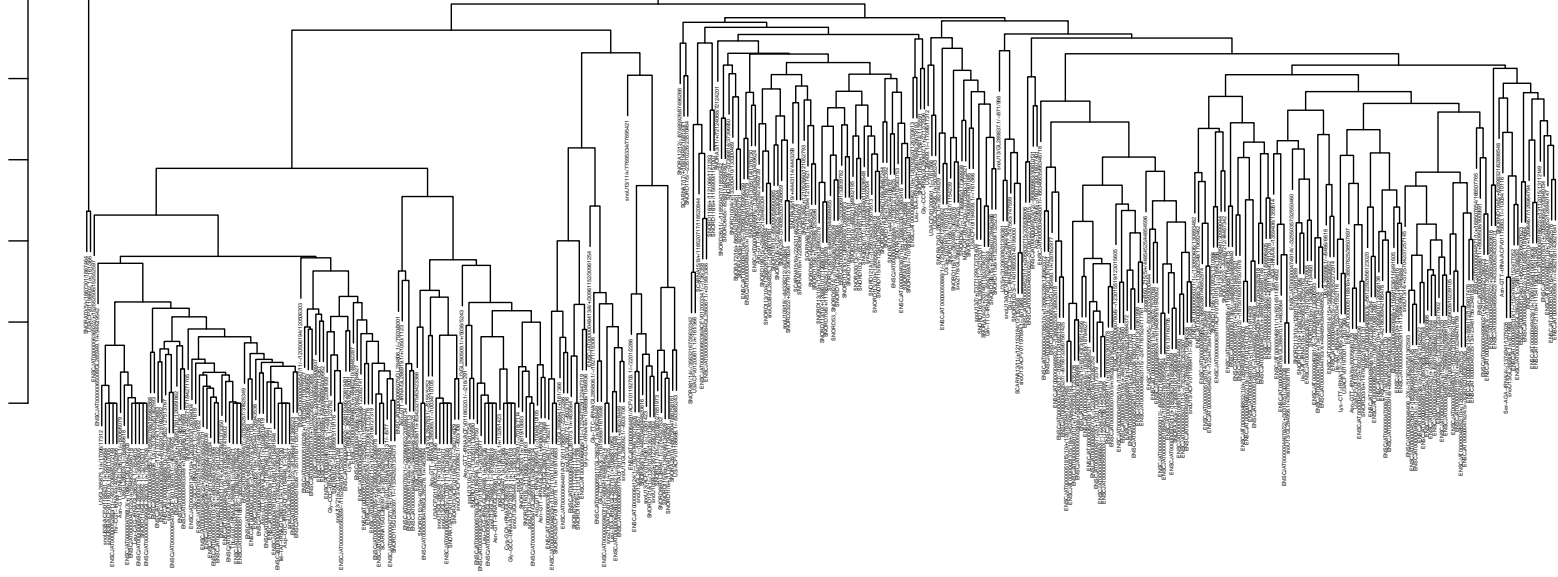

(b) Dendrogram of the hierarchical clustering result based on SHARAKU alignments for the read mapping profiles of 619 non-coding RNAs.

The annotated RNA sequences with the maximum read coverage less than 20 were all removed.

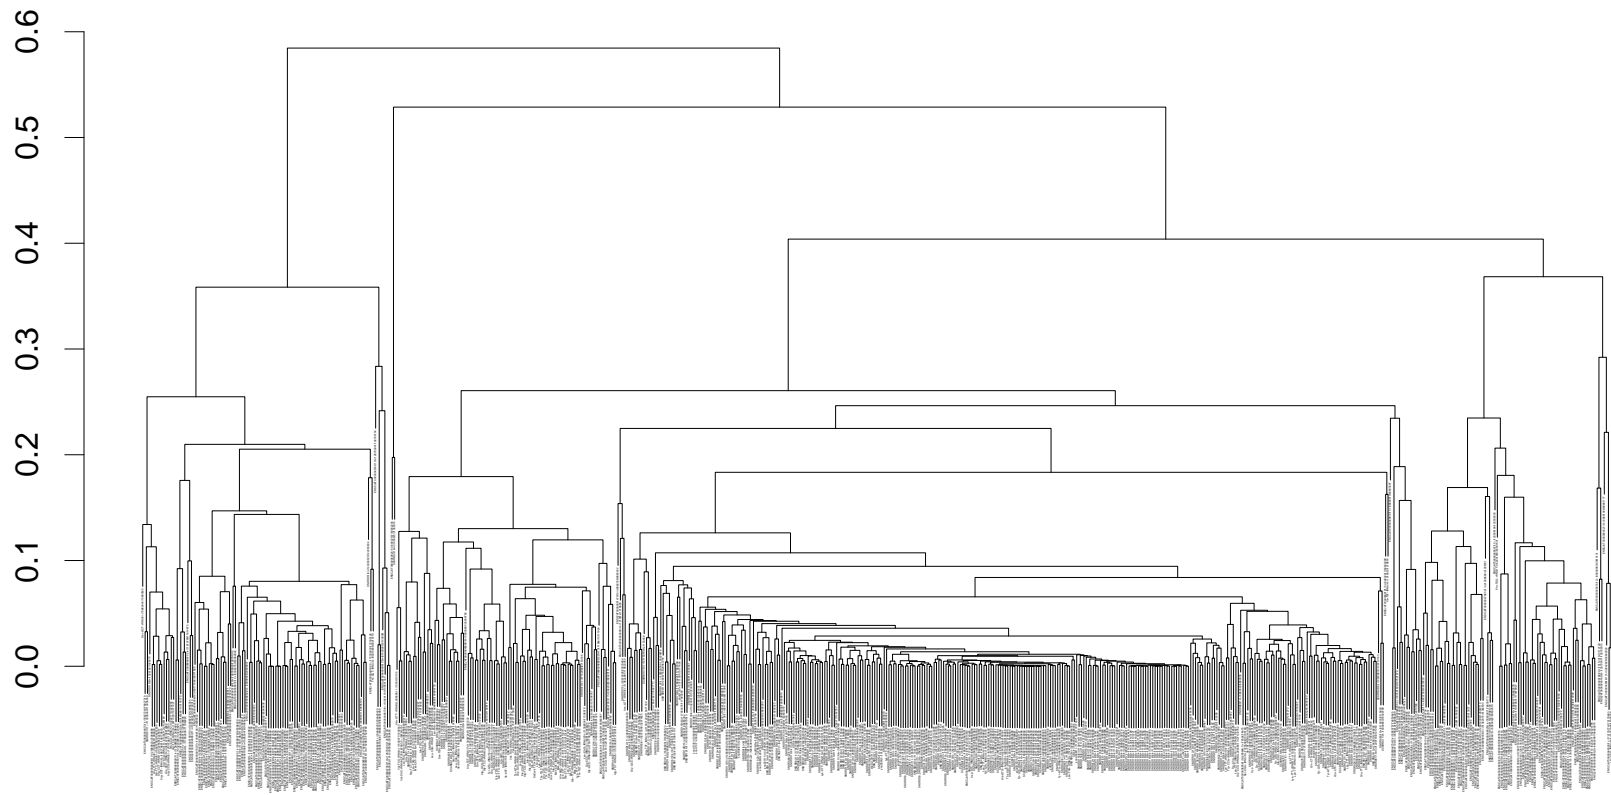

Supplement: supp_btw273_sakakibara.78.sup.pdf [file supp_btw273_sakakibara.78.sup.pdf]
